# Supplementary material for: Impact of Serious Games on Body Composition, Physical Activity, and Dietary Change in Children and Adolescents: A Systematic Review and Meta-Analysis of Randomized Controlled Trials
Source: MDPI journal article supplement (doi:10.3390/nu16091290), 2024-04-26
Supplement: s1 [file s1]

Supplementary file S4: Assessment of publication bias by funnel plot

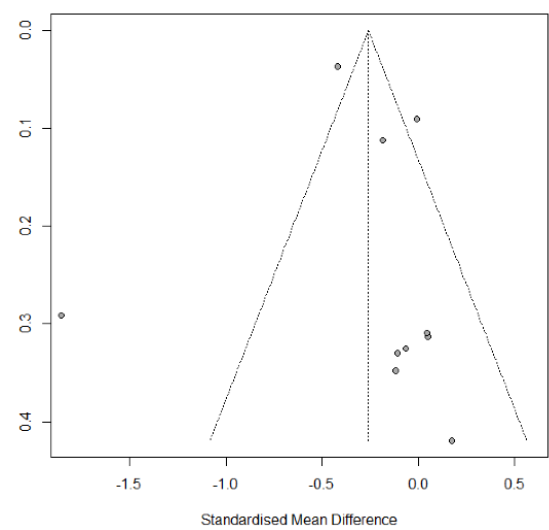

Figure S4. Publication bias for body composition

Linear regression test of funnel plot asymmetry

Test result:  $t = 0.70$ ,  $df = 8$ ,  $p\text{-value} = 0.5037$

Sample estimates:

| bias   | se.bias | intercept | se.intercept |
|--------|---------|-----------|--------------|
| 0.7574 | 1.0817  | -0.3980   | 0.1068       |

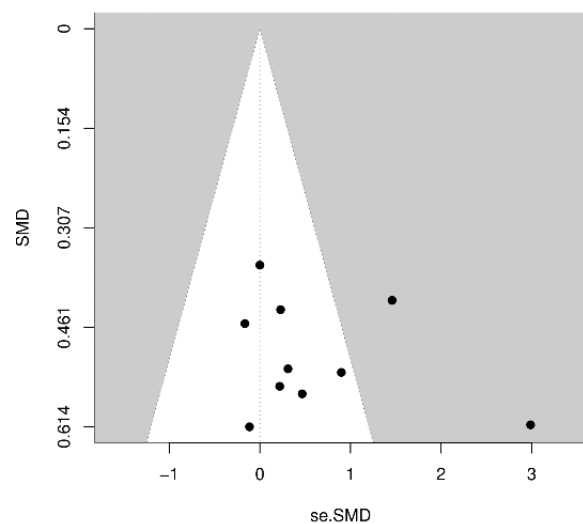

Figure S5. Publication bias for physical activity

Linear regression test of funnel plot asymmetry

Test result:  $t = 0.93$ ,  $df = 8$ ,  $p\text{-value} = 0.3791$

Sample estimates:

| bias   | se.bias | intercept | se.intercept |
|--------|---------|-----------|--------------|
| 3.0655 | 3.2930  | -0.1827   | 0.7342       |
