# Supplementary material for: Impact of Serious Games on Body Composition, Physical Activity, and Dietary Change in Children and Adolescents: A Systematic Review and Meta-Analysis of Randomized Controlled Trials
Source: MDPI journal article supplement (doi:10.3390/nu16091290), 2024-04-26
Supplement: s1 [file s1]

## Supplementary file S3: Leave-one-out sensitivity analysis

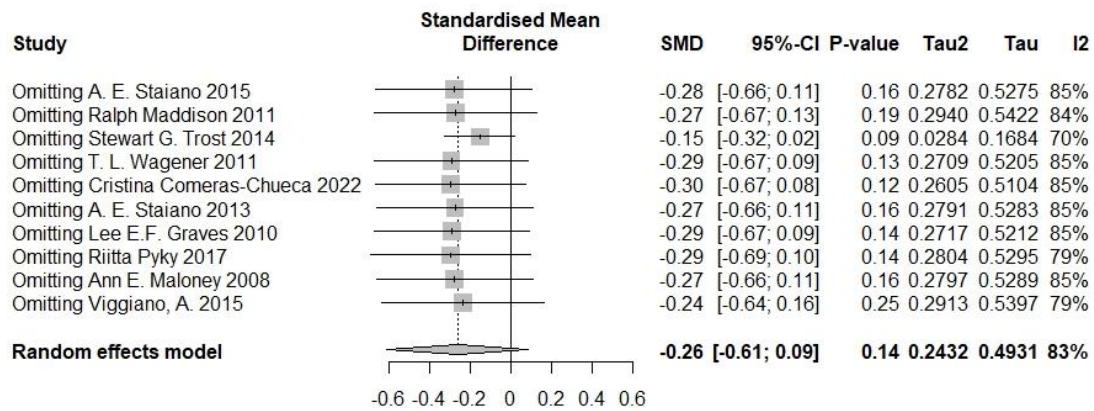

Figure S1. Sensitivity analysis for body composition

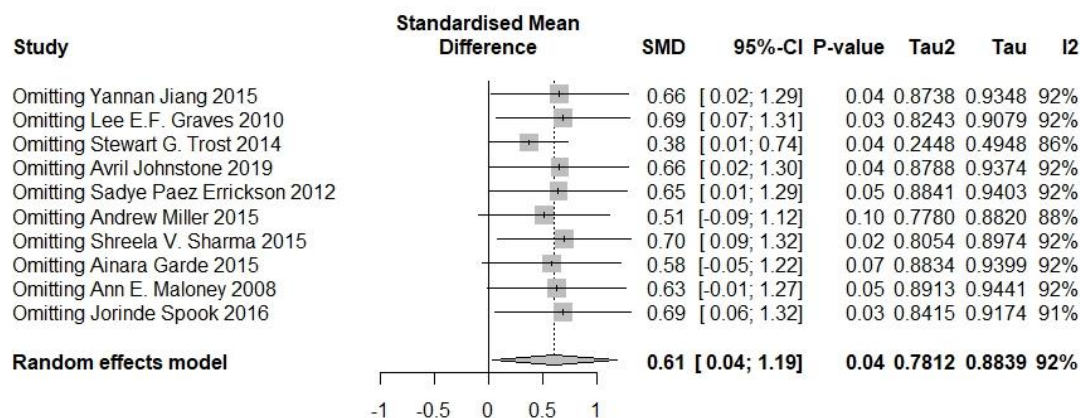

Figure S2. Sensitivity analysis for physical activity

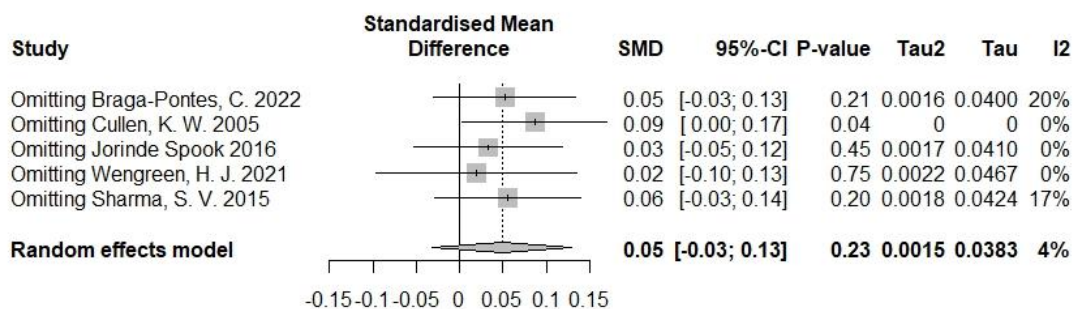

Figure S3. Sensitivity analysis for dietary change
