# Supplementary material for: Impact of Serious Games on Body Composition, Physical Activity, and Dietary Change in Children and Adolescents: A Systematic Review and Meta-Analysis of Randomized Controlled Trials
Source: MDPI journal article supplement (doi:10.3390/nu16091290), 2024-04-26
Supplement: s1 [file s1]

## Supplementary file S2

**Table S2.** Search strategies and results

### (a) PubMed

| Search number | Search terms                                                                                                                                                                                                                                 | Search results |
|---------------|----------------------------------------------------------------------------------------------------------------------------------------------------------------------------------------------------------------------------------------------|----------------|
| 1             | (Adolescent[Title/Abstract]) OR (children[Title/Abstract])                                                                                                                                                                                   |                |
| 2             | (Adolescent[MeSH Terms]) OR (child[MeSH Terms])                                                                                                                                                                                              |                |
| 3             | #1 OR #2                                                                                                                                                                                                                                     |                |
| 4             | (game) OR (gaming) OR (exergam*) OR (serious game) OR (video game) OR (videogame) OR (game-based) OR (gamifi*)                                                                                                                               |                |
| 5             | (Video Games[MeSH Terms]) OR (Exergaming[MeSH Terms]) OR (Games, Experimental[MeSH Terms]) OR (Gamification[MeSH Terms])                                                                                                                     |                |
| 6             | #4 OR #5                                                                                                                                                                                                                                     |                |
| 7             | (BMI) OR (weight) OR (physical activity) OR <sup>64</sup> OR (exercise) OR (eating) OR (food) OR (dietary habit*) OR (nutrition* knowledge)                                                                                                  |                |
| 8             | (Body Mass Index[MeSH Terms]) OR (Body Weight[MeSH Terms]) OR (Exercise[MeSH Terms]) OR (Food Preferences[MeSH Terms]) OR (Feeding Behavior[MeSH Terms]) OR (Diet[MeSH Terms])                                                               |                |
| 9             | #7 OR #8                                                                                                                                                                                                                                     |                |
| 10            | #3 AND #6 AND #9                                                                                                                                                                                                                             |                |
| 11            | (randomized controlled trial[Publication Type]) OR (controlled clinical trial[Publication Type]) OR (RCT) OR (randomized[Title/Abstract]) OR (trial[Title/Abstract]) OR (randomly[Title/Abstract]) OR (Clinical Trials as Topic[MeSH Terms]) |                |
| 12            | #3 AND #6 AND #9 AND #11                                                                                                                                                                                                                     | 1029           |

### (b) Web Of Science

| Search number | Search terms                                                                                                                                                            | Search results |
|---------------|-------------------------------------------------------------------------------------------------------------------------------------------------------------------------|----------------|
| 1             | TS=(Adolescen*) OR (children)                                                                                                                                           |                |
| 2             | TS=(game) OR (exergame*) OR (serious game) OR (video gam*) OR (videogam*) OR (game-based) OR (gamifi*)                                                                  |                |
| 3             | TS=("BMI") OR ("body mass index") OR (weight) OR (physical activity) OR <sup>64</sup> OR (exercise) OR (eating) OR (food) OR (dietary habit*) OR (nutrition* knowledge) |                |
| 4             | #1 AND #2 AND #3                                                                                                                                                        |                |
| 5             | TS=(RCT) OR ("clinical trial") OR ("controlled trial") OR ("follow-up stud*") OR ("prospective stud*") OR ("random*") OR ("single blind*") OR ("double blind*")         |                |
| 6             | #1 AND #2 AND #3 AND #5                                                                                                                                                 | 1035           |

**(c) EMBASE**

| Search number | Search terms                                                                                                                                                      | Search results |
|---------------|-------------------------------------------------------------------------------------------------------------------------------------------------------------------|----------------|
| 1             | Adolescent OR children                                                                                                                                            |                |
| 2             | 'adolescent'/exp OR 'child'/exp                                                                                                                                   |                |
| 3             | #1 OR #2                                                                                                                                                          |                |
| 4             | 'game':ti,ab,kw OR 'exergam*':ti,ab,kw OR 'serious game':ti,ab,kw OR 'video game':ti,ab,kw OR 'videogame':ti,ab,kw OR 'game-based':ti,ab,kw OR 'gamifi*':ti,ab,kw |                |
| 5             | 'game'/exp OR 'video game'/exp OR 'gamification'/exp                                                                                                              |                |
| 6             | #4 OR #5                                                                                                                                                          |                |
| 7             | 'BMI' OR 'body mass index' OR 'weight' OR 'eating' OR 'food' OR 'dietary' OR 'nutrition* knowledge' OR 'sport' OR 'exercise'                                      |                |
| 8             | 'body mass'/exp OR 'body weight'/exp OR 'eating habit'/exp OR 'food preference'/exp OR 'physical activity'/exp OR 'diet'/exp                                      |                |

|    |                                                                                                                                 |     |
|----|---------------------------------------------------------------------------------------------------------------------------------|-----|
| 9  | #7 OR #8                                                                                                                        |     |
| 10 | #3 AND #6 AND #9                                                                                                                |     |
| 11 | ('clinical trial'/de OR 'controlled clinical trial'/de OR 'randomized controlled trial'/de OR 'randomized controlled trial topi |     |
| 12 | #3 AND #6 AND #9 AND #11                                                                                                        | 577 |

---

**(d)Scopus**

| Search number | Search terms                                                                                                                                                             | Search results |
|---------------|--------------------------------------------------------------------------------------------------------------------------------------------------------------------------|----------------|
| 1             | TITLE-ABS-KEY("Adolescen*" OR "children")                                                                                                                                |                |
| 2             | TITLE-ABS-KEY("game" OR "exergam*" OR "serious game" OR "video game" OR "videogame" OR game-based OR gamifi*)                                                            |                |
| 3             | TITLE-ABS-KEY(BMI OR "body mass index" OR weight OR "physical activity" OR sport OR exercise OR eating OR food OR "diet" OR "food preference" OR "nutrition* knowledge") |                |
| 4             | TITLE-ABS-KEY ("randomi?ed controlled trial" OR "randomi?ed clinical trial" OR "controlled clinical trial" OR randomi?ed OR rct)                                         |                |
| 5             | #1 AND #2 AND #3                                                                                                                                                         |                |
| 6             | #1 AND #2 AND #3 AND #4                                                                                                                                                  | 827            |

---
